# Supplementary material for: Characterization of carbon dots from fructus gardeniae (Zhi-zi) and gardenia charcoal (black Zhi-zi) via microwave-assisted extraction
Source: PubMed Central journal article supplement — J Food Drug Anal. 2024 Sep 13;32(3):371–81. doi: 10.38212/2224-6614.3513 (PMC11464033; doi:10.38212/2224-6614.3513), 2024-09-13
Supplement: jfda-32-03-371-s001.pdf [file jfda-32-03-371-s001.pdf]

---

## *Research Highlights*

---

- Microwave-assisted extraction of CDs from gardenia charcoal.
- CDs maintain up to 92% fluorescence intensity after prolonged UV exposure, indicating remarkable photostability.
- Proven non-antibacterial activity and enhanced fluorescence properties position these CDs as promising candidates for bioimaging.
- CDs-2 exhibit superior antioxidant activity, with an SC-50 value of 21.7  $\mu\text{g/mL}$ .
